# Supplementary material
Source: publisher site journal article supplement (https://www.dovepress.com/article/241702)
Supplement: Supplementary file 1 [file get_supplementary_file.php]

**Antiviral activity of chitosan nanoparticles encapsulating** **curcumin against hepatitis C virus genotype-4a in human hepatoma cell lines**

Samah A Loutfy1,2,, Mostafa H. Elberry1, Khaled Yehia Farroh3, Hossam Taha Mohamed4,

Aya A Mohamed4, ElChaimaa B Mohamed1, Ahmed Hassan Farraag5, Shaker A. Mousa6

1 Virology and Immunology Unit, Cancer Biology Department, National Cancer Institute, Cairo University, Egypt

2 Nanotechnology Research Center, British University, Cairo, Egypt,

3 Nanotechnology and Advanced Materials Central Lab, Agricultural Research Center, Giza, Egypt

4 Faculty of Biotechnology, October University for Modern Sciences and Arts, 6th October, Egypt

5 Botany and Microbiology Department, Bioinformatics Center, Faculty of Science, Helwan University, Helwan, Egypt

6 The Pharmaceutical Research Institute, Albany College of Pharmacy and Health Sciences, Rensselaer, NY, USA

**Figure S1.** Curcumin release profile from chitosan nanoparticles in grams

**Figure S2.** mRNA expression of caspase 3 and BCL-2, RQ: fold change by real time quantitative PCR relative to β-actin housekeeping gene.

**Table S1.** Actual Combination index (CI) and dose reduction index (DRI) values for chitosan curcumin nanocomposite calculated at experimental points on huh7 cell line using CompuSyn Software.

**Table S2.** Simulated combination index (CI) and dose reduction (DRI) values for chitosan curcumin nanocomposite on huh7 cell line using CompuSyn Software.


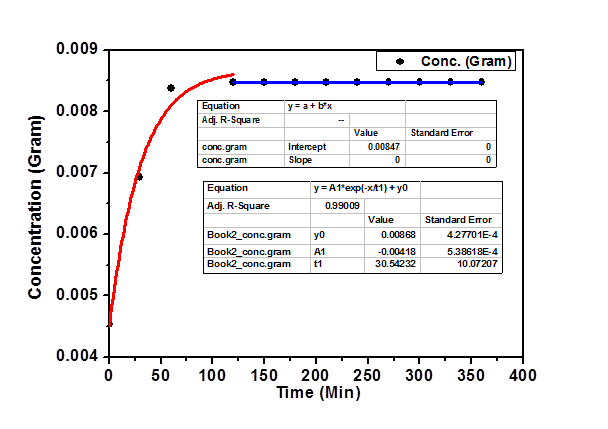


**Figure S1. Curcumin release profile from chitosan nanoparticles in grams:**

Release behavior profile of curcumin-encapsulated in chitosan nanoparticles dispersed in phosphate buffer saline (PBS), where the amount of curcumin released for 6 hours (i.e. 360 min) at 37°C was calculated and determined spectroscopically via the following equations:

(Beer's Lambert Law) (1)

(2)

**Figure S2. mRNA expression of caspase 3 and BCL-2, RQ: fold change by real time quantitative PCR relative to β-actin housekeeping gene.**

**Table S1. Actual Combination index (CI) and dose reduction index (DRI) values for chitosan curcumin nanocomposite calculated at experimental points on huh7 cell line using CompuSyn Software**

| CSNPs/Cur | | | Cur | | | CSNPs | | |
| --- | --- | --- | --- | --- | --- | --- | --- | --- |
| Fa | CI | Total Dose | Fa | Dose | DRI | Fa | Dose | DRI |
| 0.27337 | 0.23709 | 6.25 | 0.27337 | 21.9178 | 4.38355 | 0.27337 | 139.425 | 111.540 |
| 0.48577 | 0.33708 | 12.5 | 0.48577 | 31.0968 | 3.10968 | 0.48577 | 161.268 | 64.5074 |
| 0.71494 | 0.47037 | 25 | 0.71494 | 45.0650 | 2.25325 | 0.71494 | 188.187 | 37.6373 |
| 0.85112 | 0.69568 | 50 | 0.85112 | 61.6304 | 1.54076 | 0.85112 | 214.366 | 21.4366 |
| 0.88770 | 1.23630 | 100 | 0.88770 | 69.7069 | 0.87134 | 0.88770 | 225.636 | 11.2818 |

CI of each individual data without simulation and Fa: Effect of each dose, which

comes from triplicate assays.

**Table S2. Simulated combination index (CI) and dose reduction (DRI) values for chitosan curcumin nanocomposite on huh7 cell line using CompuSyn Software**

| CSNPs/Cur | | | Cur | | | CSNPs | | |
| --- | --- | --- | --- | --- | --- | --- | --- | --- |
| Fa | CI | Dose | Fa | Dose | DRI | Fa | Dose | DRI |
| 0.05 | 0.07769 | 1.22887 | 0.05 | 10.3809 | 13.1992 | 0.05 | 102.164 | 519.602 |
| 0.1 | 0.11325 | 2.36907 | 0.1 | 13.7891 | 9.09448 | 0.1 | 114.974 | 303.321 |
| 0.15 | 0.14308 | 3.55692 | 0.15 | 16.4390 | 7.22139 | 0.15 | 123.698 | 217.355 |
| 0.2 | 0.17065 | 4.83011 | 0.2 | 18.7651 | 6.07035 | 0.2 | 130.700 | 169.122 |
| 0.25 | 0.19741 | 6.21887 | 0.25 | 20.9326 | 5.25934 | 0.25 | 136.782 | 137.467 |
| 0.3 | 0.22423 | 7.75516 | 0.3 | 23.0300 | 4.64004 | 0.3 | 142.326 | 114.702 |
| 0.35 | 0.25176 | 9.47708 | 0.35 | 25.1165 | 4.14100 | 0.35 | 147.556 | 97.3109 |
| 0.4 | 0.28060 | 11.4329 | 0.4 | 27.2397 | 3.72277 | 0.4 | 152.623 | 83.4342 |
| 0.45 | 0.31138 | 13.6863 | 0.45 | 29.4439 | 3.36147 | 0.45 | 157.645 | 71.9902 |
| 0.5 | **0.34484** | 16.3247 | **0.5** | **31.7768** | **3.04148** | **0.5** | **162.726** | **62.3007** |
| 0.55 | 0.38193 | 19.4717 | 0.55 | 34.2944 | 2.75194 | 0.55 | 167.972 | 53.9153 |
| 0.6 | 0.42393 | 23.3096 | 0.6 | 37.0695 | 2.48486 | 0.6 | 173.499 | 46.5202 |
| 0.65 | 0.47272 | 28.1200 | 0.65 | 40.2031 | 2.23390 | 0.65 | 179.457 | 39.8863 |
| 0.7 | 0.53115 | 34.3637 | 0.7 | 43.8456 | 1.99364 | 0.7 | 186.051 | 33.8386 |
| 0.75 | 0.60396 | 42.8528 | 0.75 | 48.2388 | 1.75889 | 0.75 | 193.592 | 28.2350 |
| 0.8 | 0.69979 | 55.1738 | 0.8 | 53.8106 | 1.52390 | 0.8 | 202.600 | 22.9502 |
| 0.85 | 0.83664 | 74.9232 | 0.85 | 61.4248 | 1.28100 | 0.85 | 214.069 | 17.8573 |
| 0.9 | 1.06127 | 112.490 | 0.9 | 73.2291 | 1.01716 | 0.9 | 230.312 | 12.7963 |
| 0.95 | 1.56072 | 216.862 | 0.95 | 97.2713 | 0.70084 | 0.95 | 259.190 | 7.46990 |
| 0.97 | 2.05621 | 345.954 | 0.97 | 119.046 | 0.53767 | 0.97 | 281.917 | 5.09311 |

Fa: fraction effect, CI: Combination Index, DRI: Dose Reduction Index

CI< 1: Synergism, CI> 1: Antagonism, CI=1: additive

**Cytoplasm**
